# Supplementary material
Source: PubMed Central journal article supplement (PMC3059035)
Supplement: supp_M110.166819_suppl_Fig_1.pdf [file supp_M110.166819_suppl_Fig_1.pdf]

I684C Control

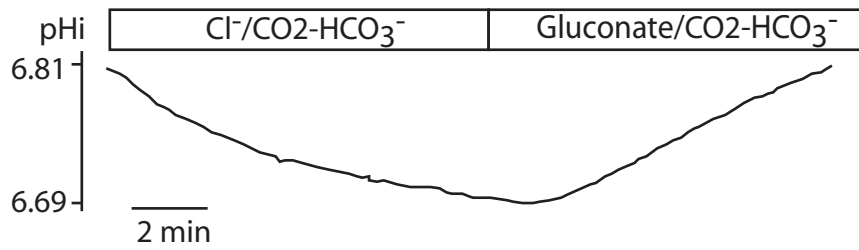

I684C MTSEA 5 mM

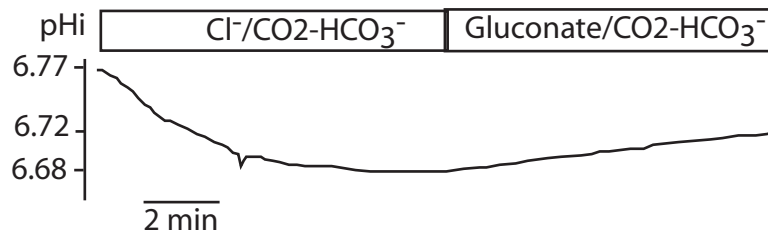

L677C Control

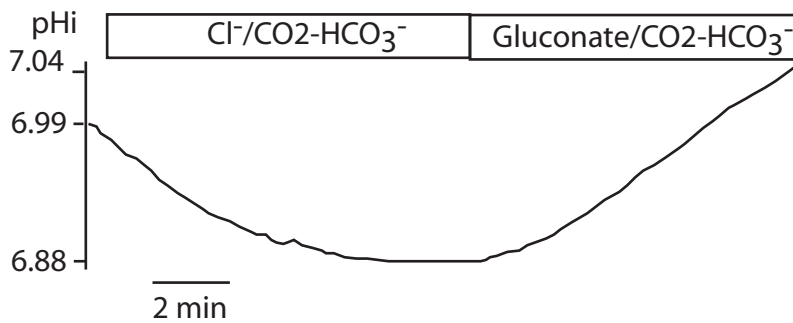

L677C PCMBMS 0.2 mM

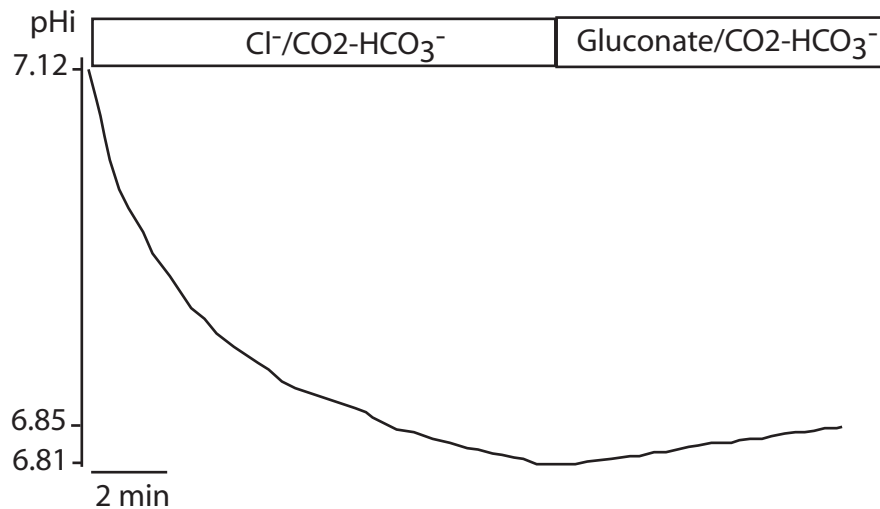

Representative traces of pHi recordings in oocytes expressing two different cysteine mutants of AE1: I684C and L677C. Mutants were in control condition or treated by 5 mM MTSEA (I684C) or 0.2 mM PCMBMS (L677C). The proton potential recorded on the y axis was converted into pHi values according to calibration of the proton selective microelectrode.
